# Supplementary material
Source: publisher figshare collection journal article supplement (https://acs.figshare.com/ndownloader/files/4190005)
Supplement: Supplementary file 1 [file 4190005]

# **Supporting Information**

## **Preparation, Structure, and Reactions of Trifluoroacetimidoyl Palladium(II) Complexes**

Hideki Amii,\* Katsuhiko Kageyama, Yosuke Kishikawa, Tsuyoshi Hosokawa, Ryo  
Morioka, Toshimasa Katagiri, and Kenji Uneyama\*

Department of Applied Chemistry, Faculty of Engineering, Okayama University,  
Okayama 700-8530, Japan and Department of Chemistry and Chemical Biology,  
Graduate School of Engineering, Gunma University, Kiryu, Gunma 376-8515 Japan

amii@chem-bio.gunma-u.ac.jp, uneyamak@cc.okayama-u.ac.jp

### **Table of Contents**

|                                      |        |
|--------------------------------------|--------|
| General Remarks .....                | S2     |
| Experimental Procedures .....        | S2–S5  |
| Spectral Characterization Data ..... | S6–S23 |
| References .....                     | S24    |

## General Remarks:

All reactions were carried out under a nitrogen atmosphere in flame-dried glassware. Syringes which were used to transfer anhydrous solvents or reagents were purged with argon prior to use. Benzene and toluene were distilled from CaH<sub>2</sub>. Nitromethane was dried over CaSO<sub>4</sub> and distilled. All other reagents and solvents were employed without further purification. Trifluoroacetimidoyl chlorides **1b** and **1c** were prepared in 80-90% yields by refluxing a mixture of TFA (1 equiv.), *p*-anisidine (for **1b**) or *n*-hexylamine (for **1c**) (1 equiv.), triphenylphosphine (3 equiv.) and triethylamine (1 equiv.) in CCl<sub>4</sub>.<sup>1</sup> Trifluoroacetimidoyl iodide **1a** was prepared by replacement of chlorine atom of the corresponding chloride **1b** with sodium iodide in acetone quantitatively. <sup>1</sup>H NMR spectra were recorded using Me<sub>4</sub>Si as an internal standard (δ 0 ppm). <sup>19</sup>F NMR spectra were recorded using hexafluorobenzene (C<sub>6</sub>F<sub>6</sub>) as an internal standard (δ 0 ppm). <sup>31</sup>P NMR spectra were recorded by the use of phosphoric acid (85 wt% H<sub>3</sub>PO<sub>4</sub>) as an internal standard (δ 0 ppm). Splitting patterns were reported as s, singlet; d, doublet; t, triplet; q, quartet; m, multiplet; br, broad.

## Iodo[*N*-(*p*-methoxyphenyl)-2,2,2-trifluoroacetiminoacyl]bis(triphenylphosphine)palladium(II) (**2a**).

To a solution of Pd(PPh<sub>3</sub>)<sub>4</sub> (0.920 g, 0.80 mmol) in 15 mL of benzene was added *N*-(*p*-methoxyphenyl)-2,2,2-trifluoroacetimidoyl iodide (**1a**) (0.790 g, 2.40 mmol). After stirring for 24 h at room temperature with minimum exposure to light, a pale yellowish suspension was obtained. The solvent was slowly evaporated to ca. one-third of its original volume. Dropwise addition of hexane with sonication provided the precipitate, which was washed with ether by several times to afford orange powder of **2a** (0.761 g, 99%); mp 168.0-170.0 °C; IR (KBr) 1614 cm<sup>-1</sup>; <sup>1</sup>H NMR (500 MHz, CDCl<sub>3</sub>) δ 3.83 (s, 3H), 6.73 (d, 2H, *J* = 8.4 Hz), 7.28-7.38 (m, 12H), 7.36-7.44 (m, 6H), 7.52-7.60 (m, 12H), 7.84 (d, 2H, *J* = 8.4 Hz); <sup>19</sup>F NMR (470 MHz, CDCl<sub>3</sub>) δ 101.0 (s, 3F); <sup>31</sup>P NMR (203 MHz, CDCl<sub>3</sub>) δ 18.6 (s, 2P). Anal. Calcd for C<sub>45</sub>H<sub>37</sub>F<sub>3</sub>INOP<sub>2</sub>Pd: C, 56.30; H, 3.88; N, 1.46. Found: C, 56.01; H, 3.95; N, 1.19.

## Chloro[*N*-(*p*-methoxyphenyl)-2,2,2-trifluoroacetiminoacyl]bis(triphenylphosphine)palladium(II) (**2b**).

To a solution of Pd(PPh<sub>3</sub>)<sub>4</sub> (3.47 g, 3.0 mmol) in 50 mL of benzene was added *N*-(*p*-methoxyphenyl)-2,2,2-trifluoroacetimidoyl chloride (**1b**) (2.12 g, 9.0 mmol). After stirring for 2 days at room temperature, a pale yellowish suspension was given. The solvent was slowly evaporated to ca. one-third of its original volume. Dropwise addition of hexane with sonication provided the precipitate, which was washed with ether by several times to afford the colorless powder of **2b** (2.57 g, 99%); mp 195.0-197.0 °C; IR (KBr) 1610 cm<sup>-1</sup>; <sup>1</sup>H NMR (500 MHz, CDCl<sub>3</sub>) δ 3.79 (s, 3H), 6.63 (d, 2H, *J* = 8.4

Hz), 7.28-7.36 (m, 12H), 7.37-7.44 (m, 6H), 7.48-7.58 (m, 12H), 7.76 (d, 2H,  $J = 8.4$  Hz);  $^{19}\text{F}$  NMR (470 MHz,  $\text{CDCl}_3$ )  $\delta$  100.2 (s, 3F);  $^{31}\text{P}$  NMR (203 MHz,  $\text{CDCl}_3$ )  $\delta$  21.9 (s, 2P). Anal. Calcd for  $\text{C}_{45}\text{H}_{37}\text{ClF}_3\text{NOP}_2\text{Pd}$ : C, 62.23; H, 4.29; N, 1.61. Found: C, 62.45; H, 4.38; N, 1.49.

**Chloro(*N*-hexyl-2,2,2-trifluoroacetiminoacyl)bis(triphenylphosphine)palladium(II) (2c).** Using the procedure for **2b**, the reaction of **1c** (2.44 g, 11.3 mmol) and  $\text{Pd}(\text{PPh}_3)_4$  (4.37 g, 3.78 mmol) for over night produced the colorless powder of **2c** (3.22 g, 99%); mp 157.0-159.0 °C; IR (KBr)  $1624\text{ cm}^{-1}$ ;  $^1\text{H}$  NMR (500 MHz,  $\text{CDCl}_3$ )  $\delta$  0.85 (t, 3H,  $J = 6.1$  Hz), 1.00-1.17 (m, 4H), 1.20-1.38 (m, 4H), 3.23-3.40 (m, 2H), 7.28-7.42 (m, 18H), 7.55-7.70 (m, 12H);  $^{19}\text{F}$  NMR (470 MHz,  $\text{CDCl}_3$ )  $\delta$  99.2 (s, 3F);  $^{31}\text{P}$  NMR (203 MHz,  $\text{CDCl}_3$ )  $\delta$  23.1 (s, 2P). Anal. Calcd for  $\text{C}_{44}\text{H}_{43}\text{ClF}_3\text{INP}_2\text{Pd}$ : C, 62.42; H, 5.12; N, 1.65. Found: C, 62.32; H, 5.51; N, 1.94.

**Transmetalation Reaction of 2a with Ph-SnBu<sub>3</sub>. Synthesis of *N*-(*p*-Methoxyphenyl)-1-phenyl-1-trifluoromethylimine (8).** To a solution of complex **2a** (0.288 g, 0.30 mmol) in 4.0 mL of DMF was added Ph-SnBu<sub>3</sub> (0.111 g, 0.30 mmol). After stirring for 20 h at 60 °C, then the mixture was poured into brine. The product was extracted with ether, and the combined organic phase was dried over  $\text{Na}_2\text{SO}_4$ . The solvent was removed under reduced pressure, and the residue was purified by silica gel column chromatography (hexane:AcOEt = 5:1) to afford the yellow oil of **8** (45.6 mg, 54%).<sup>2</sup>

**Tetra- $\mu$ -iodo-tetrakis{[*N*-(*p*-methoxyphenyl)-2,2,2-trifluoroacetiminoacyl]palladium(II)} (2d).** To a solution of  $\text{Pd}_2(\text{dba})_3 \cdot \text{CHCl}_3$  (0.052 g, 0.050 mmol) in 1 mL of toluene was added *N*-(*p*-methoxyphenyl)-2,2,2-trifluoroacetimidoyl iodide (**1a**) (0.036 g, 0.10 mmol). After stirring for 24 h at room temperature with minimum exposure to light, the solvent was evaporated. In order to remove dibenzylideneacetone (dba) from the mixture, recrystallization from ether was carried out, then the solvent of the mother liquor was evaporated. Purification of the residue by column chromatography on silica gel (hexane/ethyl acetate = 25/1) gave red solids of **2d** (0.040 g, 92%); mp 162.0-164.0 °C; IR (KBr)  $1608\text{ cm}^{-1}$ ;  $^1\text{H}$  NMR (500 MHz,  $\text{CDCl}_3$ )  $\delta$  3.82 (s, 12H), 6.88 (s, 16H);  $^{19}\text{F}$  NMR (470 MHz,  $\text{CDCl}_3$ )  $\delta$  104.0 (s, 12F). Anal. Calcd for  $\text{C}_{36}\text{H}_{28}\text{F}_{14}\text{I}_4\text{N}_4\text{O}_4\text{Pd}_4$ : C, 24.82; H, 1.62; N, 3.22. Found: C, 25.22; H, 1.92; N, 3.22.

**Carboalkoxylation of Imidoyl Iodides. Synthesis of *tert*-Butyl 2-[*N*-(*p*-Methoxyphenyl)imino]-3,3,3-trifluoropropanoate (6a).** A two-necked flask with a CO balloon (1 atm) attached was charged with Pd complex **1d** (13.1 mg, 75  $\mu$ mol) and K<sub>2</sub>CO<sub>3</sub> (88 mg, 0.64 mmol). Then 100 mg (0.30 mmol) of trifluoroacetimidoyl iodide **1a** in 0.9 mL of *tert*-butyl alcohol was added to the catalyst mixture. Subsequently, 0.1 mL of DMI was added. The reaction vessel was wrapped in aluminum foil to minimize exposure to light, and the mixture was stirred for 3 days at room temperature. The resulting suspension was filtered through a short Florisil column (CH<sub>2</sub>Cl<sub>2</sub>). After evaporation of the solvent, the residue was purified by silica gel column chromatography (hexane/ether = 15/1) to give a yellow oil of **6a** (70 mg, 0.23 mmol, 77%).<sup>3</sup>

**Synthesis of (*N*-Hexyl-*N*-methylamino)(trifluoromethyl)carbene Palladium(II) Complex (11).** A two-necked flask with a septum cap was charged with **2c** (4.45 g, 5.26 mmol) and activated molecular sieves 4A. Trimethyloxonium tetrafluoroborate (95%, 0.855 g, 5.78 mmol) was speedily added as a solid, and then nitromethane (30 mL) was added under an argon atmosphere. The mixture was stirred for 2 h at room temperature and passed through a short column of Celite (eluent: nitromethane). After exhaustive evaporation of solvent, 5 mL of dichloromethane was added. Dropwise addition of ether with sonication provided the precipitate, which was washed with ether by several times to afford the pale yellowish powder of **11** (4.25 g, 85%); IR (KBr) 1484, 1438 cm<sup>-1</sup>; <sup>1</sup>H NMR (500 MHz, CDCl<sub>3</sub>)  $\delta$  0.90 (t, 3H, *J* = 7.0 Hz), 0.97-1.12 (m, 2H), 1.18-1.36 (m, 4H), 1.50-1.68 (m, 2H), 3.19 (s, 3H), 4.40-4.50 (m, 2H), 7.33-7.78 (m, 30H); <sup>19</sup>F NMR (470 MHz, CDCl<sub>3</sub>)  $\delta$  8.86 (s, 4F), 100.9 (s, 3F). Anal. Calcd for C<sub>45</sub>H<sub>46</sub>BClF<sub>7</sub>NP<sub>2</sub>Pd: C, 56.99; H, 4.89; N, 1.48. Found: C, 56.69; H, 4.86; N, 1.51.

**Reaction of 11 with Elemental Sulfur: Synthesis of *N*-Hexyl-*N*-methyl-2,2,2-trifluoroethanethioamide (13).** A glass tube was charged with the Pd-complex **18** (94.8 mg, 0.10 mmol) and elemental sulfur (32.0 mg, 1.0 mmol). The tube was sealed with a flame, then the mixture was immersed into an oil bath at 70 °C. After warming to 160 °C, the bath temperature was kept for 24 h and passed through a Celite pad (eluent: ether). The solvent was removed under reduced pressure. The residue was purified by preparative thin layer chromatography (hexane:AcOEt = 5:1) to afford the yellow oil of **13** (44.4 mg, 44% yield, a mixture of two geometrical isomer, isomer ratio was 1.18:1.00); IR (neat) 1514 cm<sup>-1</sup>; <sup>1</sup>H NMR (500 MHz, CDCl<sub>3</sub>)  $\delta$  0.86-0.93 (m, 3H), 1.24-1.38 (m, 6H), 1.66-1.76 (m, 2H), 3.38 (s, 3H, minor isomer), 3.40 (s, 3H, major isomer), 3.69 (t, 2H, *J* = 8.0 Hz, major isomer), 3.93 (t, 2H, *J* = 7.9 Hz, minor isomer); <sup>19</sup>F NMR (470 MHz, CDCl<sub>3</sub>)  $\delta$  99.0 (s, 3F, minor isomer), 100.3 (s,

3F, major isomer); EI-MS  $m/z$  (%) 227 ( $M^+$ , 36), 194 (81), 184 (34), 157 (24), 138 (32), 110 (100). Anal. Calcd for  $C_9H_{16}F_3NS$ : C, 47.56; H, 7.10; N, 6.16. Found: C, 47.44; H, 6.75; N, 6.15.

**Reaction of Chloro[*N*-(*n*-hexyl)-2,2,2-trifluoroacetiminoacyl]bis(triphenylphosphine)palladium(II) (**2c**) with Methyl Thioglycolate: Synthesis of 3-Hexyl-2-**

**(trifluoromethyl)thiazolidin-4-one (**14**).** A glass tube was charged with complex **2c** (169.2 mg, 0.20 mmol) and methyl thioglycolate (42.5 mg, 0.40 mmol). The tube was sealed with a flame, then the mixture was immersed into an oil bath at 90 °C. After warming to 170 °C, the bath temperature was kept at 170 °C for 24 h and passed through a Celite pad (eluent: ether). The solvent was removed under reduced pressure. The residue was purified by silica gel column chromatography (hexane:AcOEt = 10:1) to provide the colorless powder and oil. Further distillation of the obtained mixture was performed (ca. 0.1 mmHg, 100 °C) to afford the colorless oil of **14** (0.120 g, 47%); IR (neat) 1694  $cm^{-1}$ ;  $^1H$  NMR (500 MHz,  $CDCl_3$ )  $\delta$  0.80-0.90 (m, 3H), 1.10-1.20 (m, 6H), 1.55-1.78 (m, 2H), 3.10-3.20 (m, 1H), 3.44 (d, 1H,  $J$  = 15.5 Hz), 3.75 (d, 1H,  $J$  = 15.5 Hz), 3.81-3.89 (m, 1H), 4.83 (q, 1H,  $J$  = 5.3 Hz);  $^{19}F$  NMR (470 MHz,  $CDCl_3$ )  $\delta$  86.2 (d, 3F,  $J$  = 5.3 Hz); EI-MS  $m/z$  (%) 170 ( $M^+$ , 100), 142 (9). Anal. Calcd for  $C_{10}H_{16}F_3NOS$ : C, 47.05; H, 6.31; N, 5.49. Found: C, 47.22; H, 6.37; N, 5.30.

<sup>1</sup>H NMR Spectrum of Compound 2a

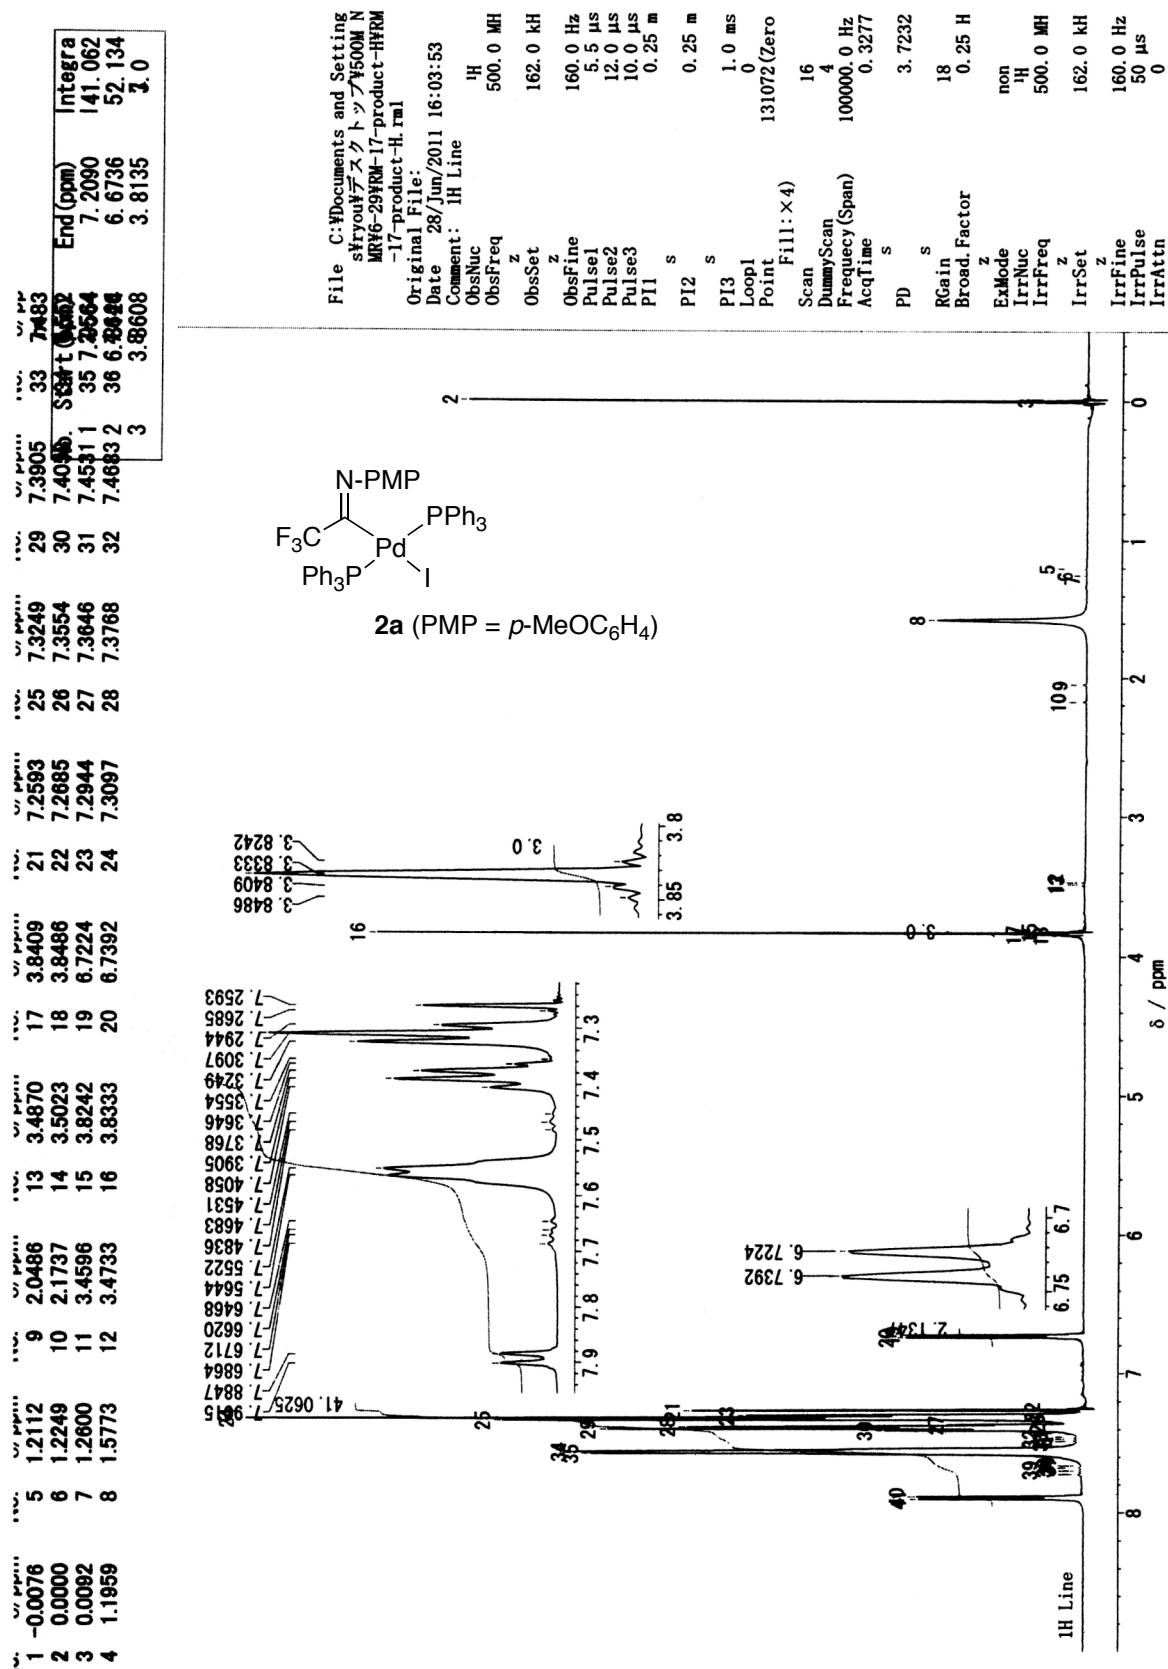

<sup>19</sup>F NMR Spectrum of Compound **2a**

| No. | δ/ppm    | Height |
|-----|----------|--------|
| 1   | 0.0000   | 24.58  |
| 2   | 100.9985 | 100    |

| No. | Start(ppm) | End(ppm) | Integral |
|-----|------------|----------|----------|
| 1   | 101.102    | 100.875  | 1.0      |

File C:\Documents and Settings  
 sryou\デスクトップ\F500M N  
 MR46-29\FRM-17-product-FYRM  
 -17-product-F.nmfid  
 Original File: C:\Documents a  
 nd Settings\sryou\デスクト  
 ップ\F500M NMR46-29\FRM-17-p  
 roduct-FYRM-17-product-F.n  
 mfid  
 Date 28/Jun/2011 16:22:08  
 Comment: 1H Line  
 ObsNuc <sup>19</sup>F  
 ObsFreq 470.4 MHz  
 ObsSet 163.0 kHz  
 ObsFine 190.25 Hz  
 Pulse 6.08 μs  
 Pulse2 12.0 μs  
 Pulse3 10.0 μs  
 P11 600.0 ms  
 P12 0.05 m  
 P13 1.0 ms  
 Loop 0  
 Point 131072(Zero  
 Fill: ×4)  
 Scan 16  
 DummyScan 4  
 Frequency(Span) 100000.0 Hz  
 AcqTime 0.3277  
 PD s 5.6893  
 RGain s 23  
 Broad.Factor 0.25 H  
 ExMode z non  
 IrrNuc <sup>1</sup>H  
 IrrFreq 500.0 MHz

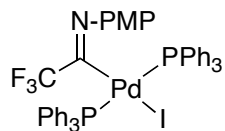

**2a** (PMP = *p*-MeOC<sub>6</sub>H<sub>4</sub>)

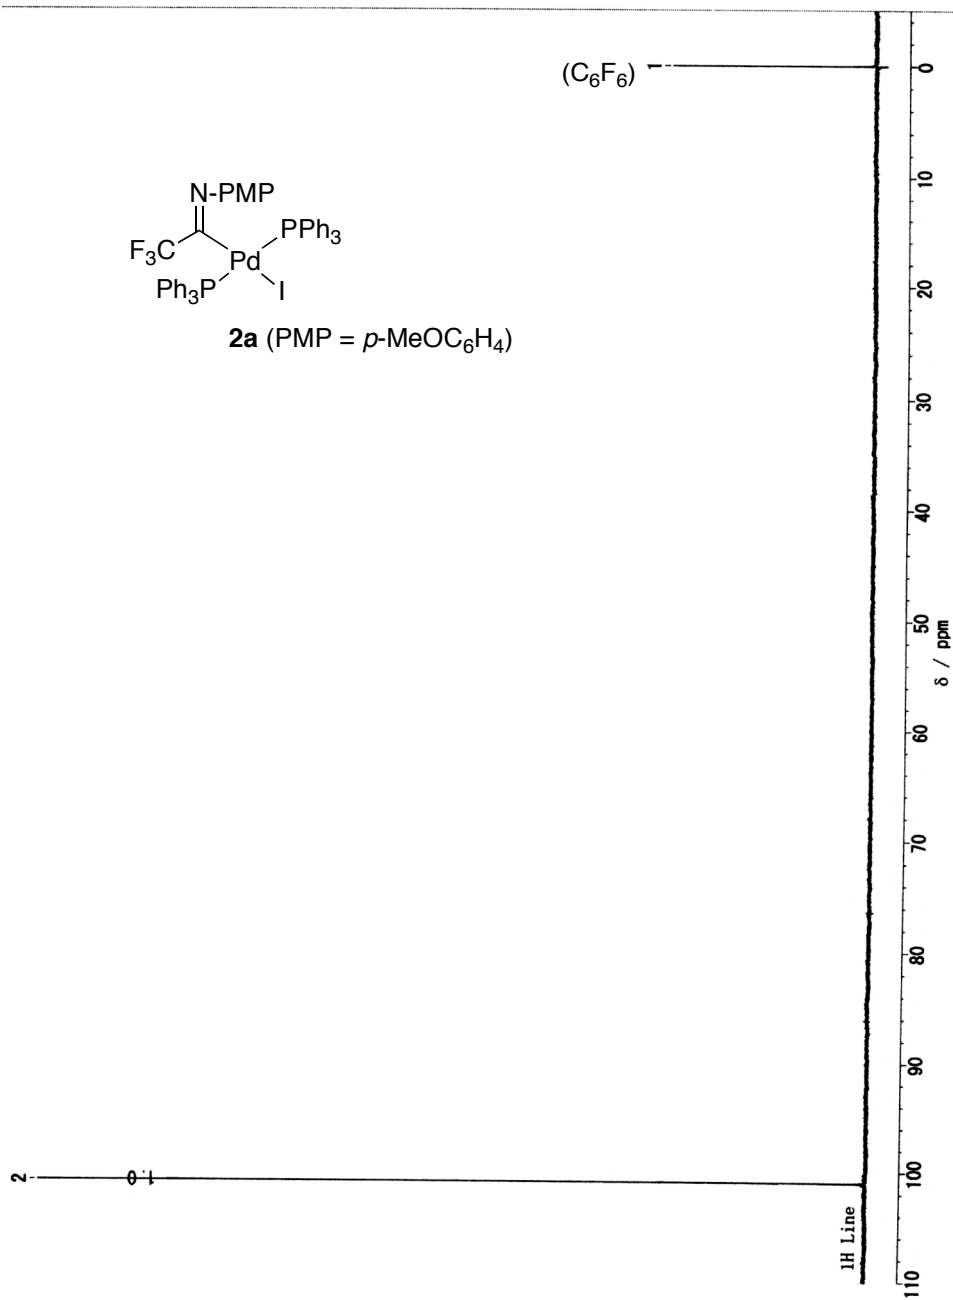

<sup>31</sup>P NMR Spectrum of Compound **2a**

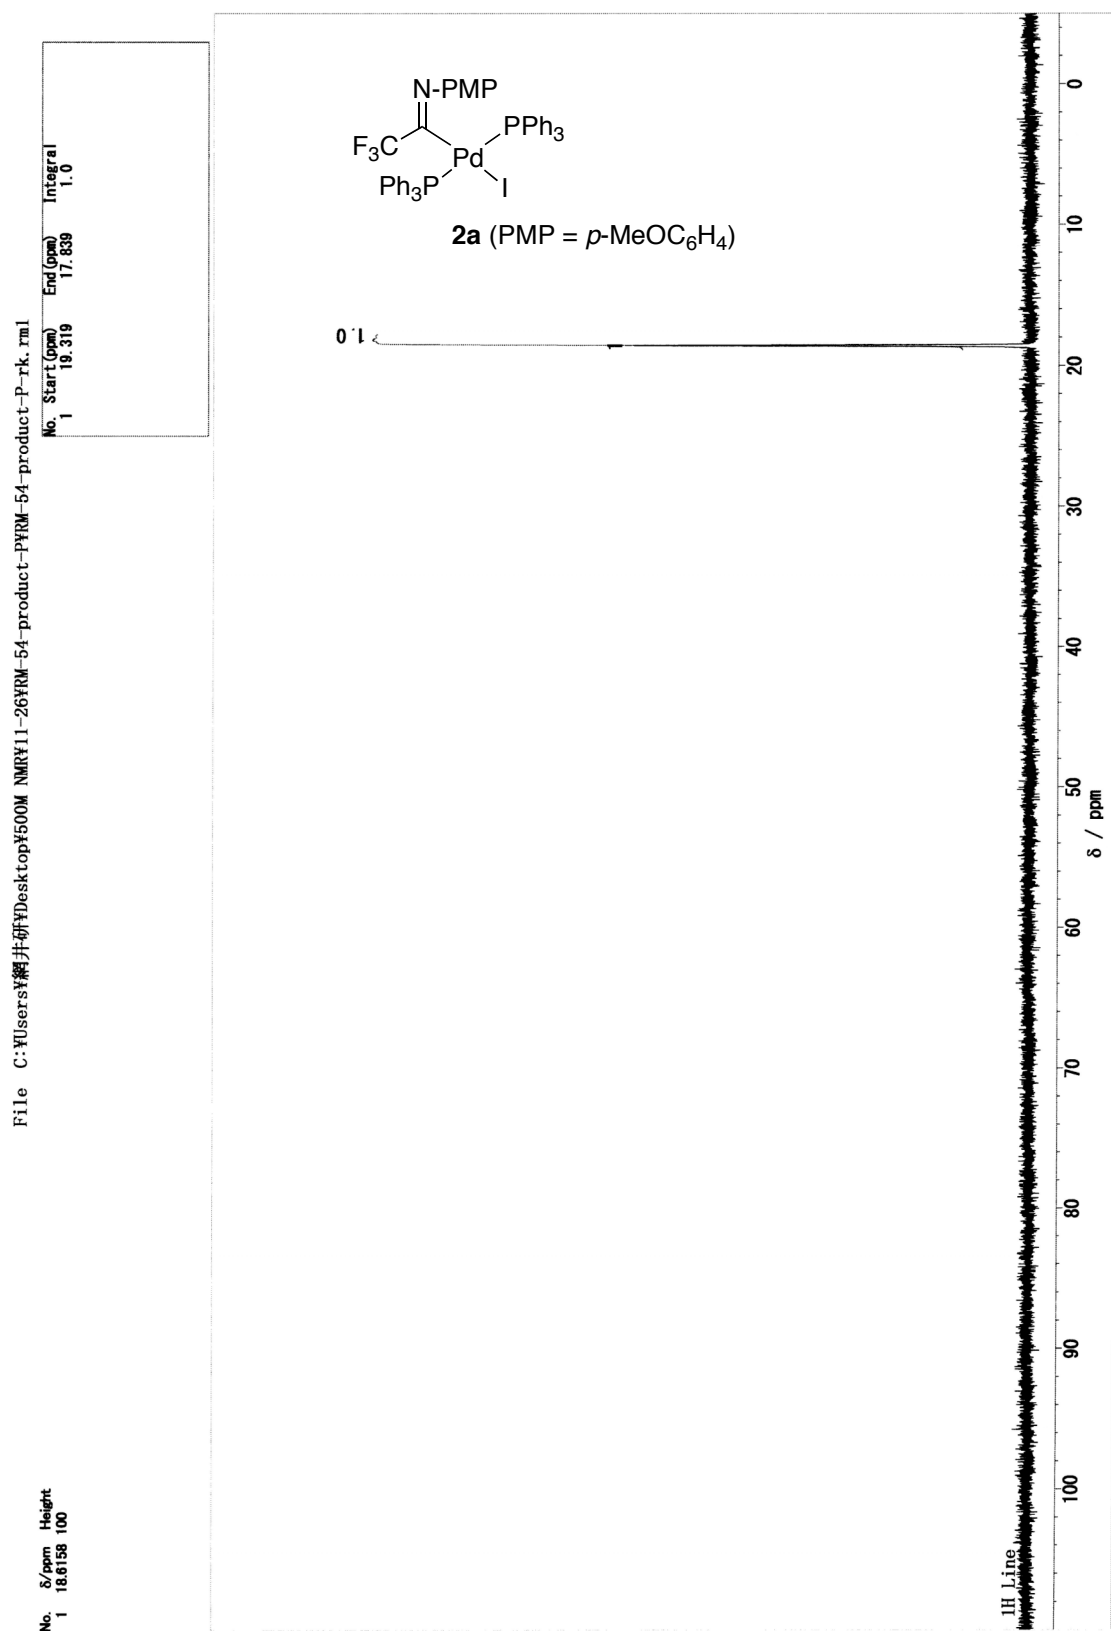



### <sup>1</sup>H NMR Spectrum of Compound **2b**

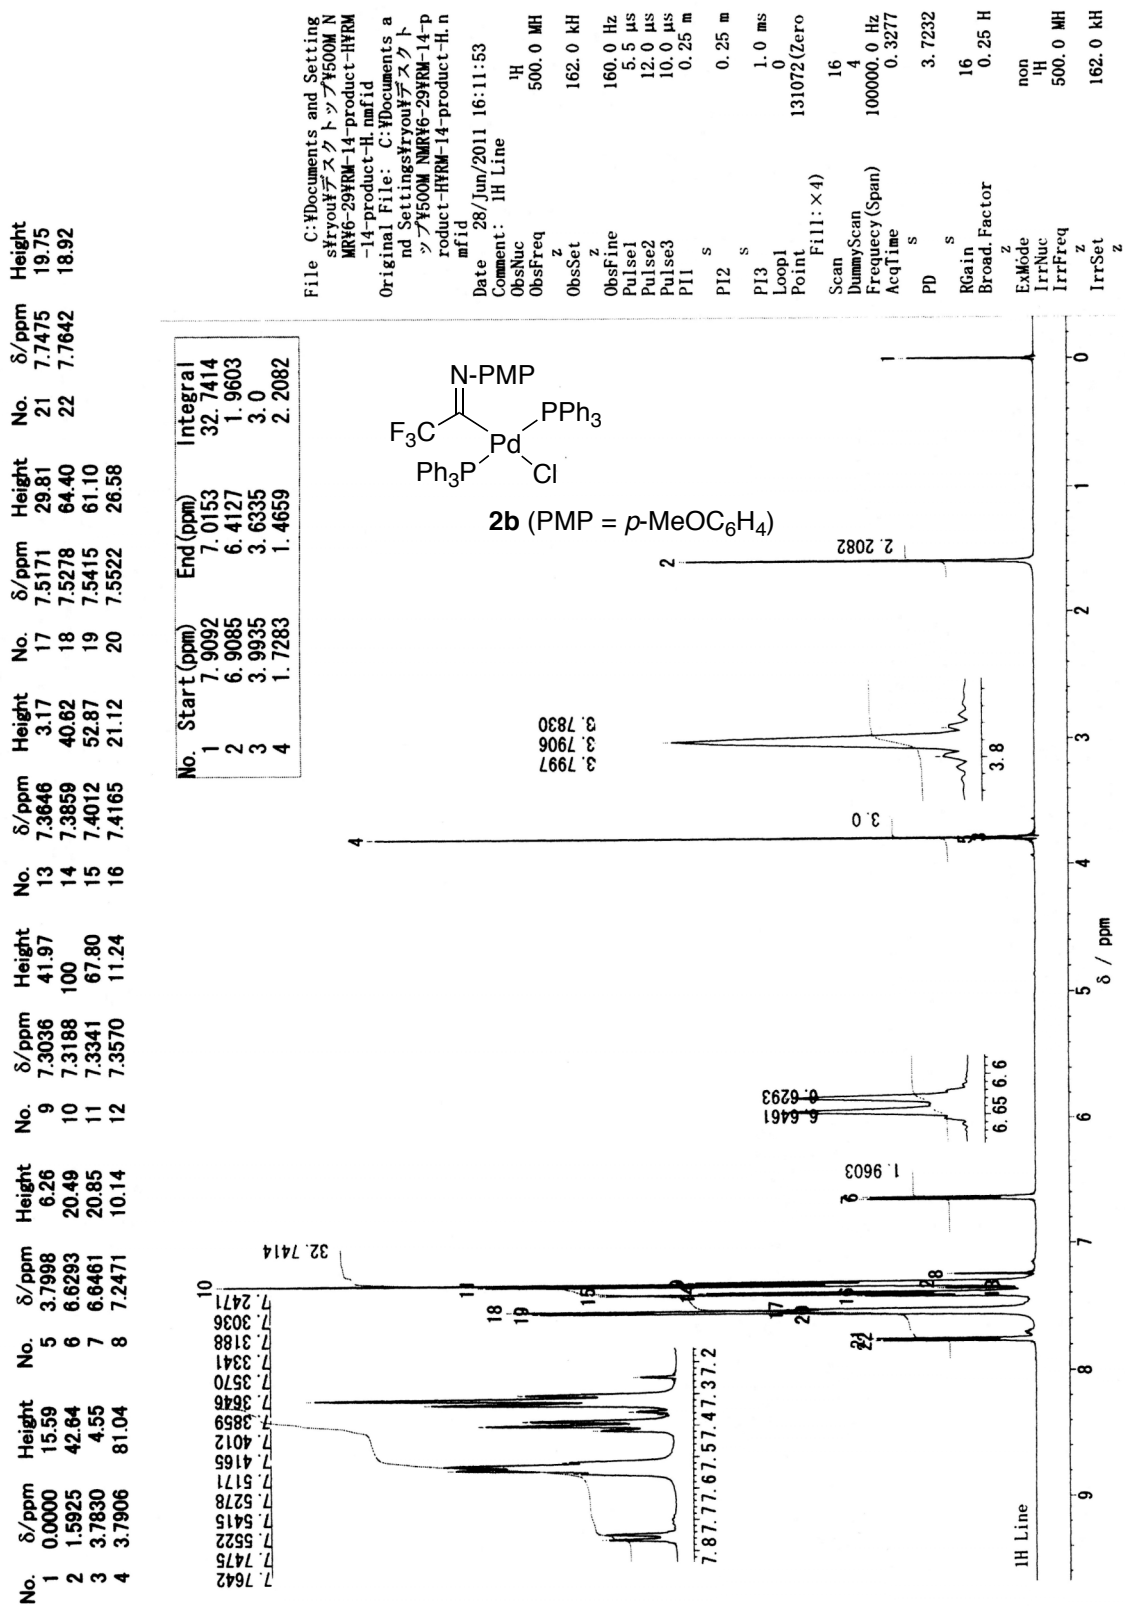

<sup>19</sup>F NMR Spectrum of Compound **2b**

| No. | Start (ppm) | End (ppm) | Integral |
|-----|-------------|-----------|----------|
| 1   | 101.282     | 99.495    | 1.0      |

| No. | δ/ppm    | Height |
|-----|----------|--------|
| 1   | 0.0000   | 72.57  |
| 2   | 100.1553 | 2.30   |
| 3   | 100.1618 | 5.26   |
| 4   | 100.1780 | 100    |

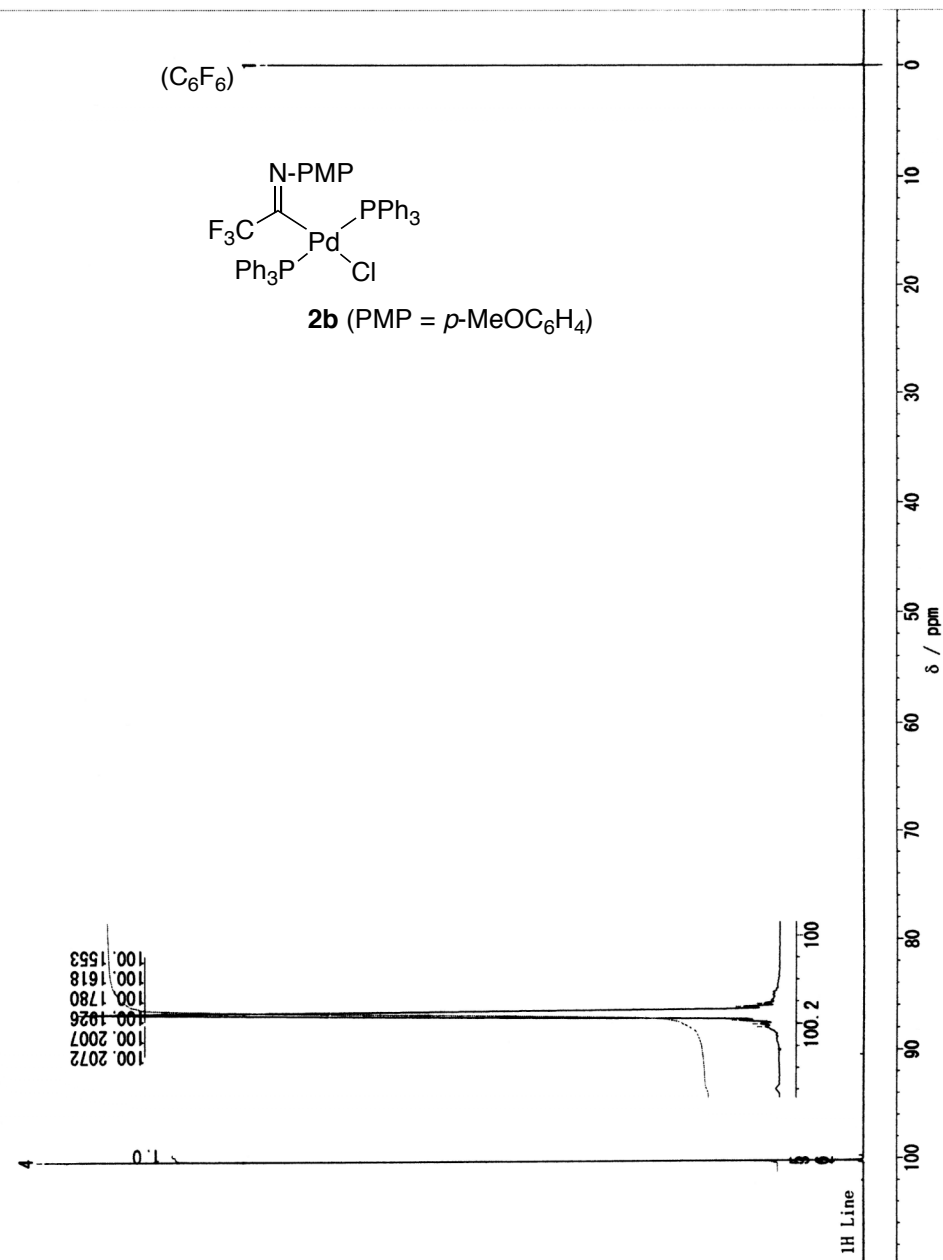

File C:\Documents and Set  
sryouyデスクトップ\50  
MR46-29YRM-14-product-  
-14-product-f.nmfd  
Original File: C:\Documents  
and Settings\sryouy\Desktop  
50000 MR46-29YRM-  
product-FYRM-14-product  
nmfd  
Date 28/Jun/2011 16:30:4  
Comment: 1H Line  
ObsNuc 19F  
ObsFreq 470.  
ObsSet 163.  
ObsFine 190.  
Pulse1 6.  
Pulse2 12.  
Pulse3 10.  
PI1 600.  
PI2 0.  
PI3 1.  
Loop 0  
Point 131072 (C  
Fill: × 4)  
Scan 16  
DummyScan 4  
Frequency (Span) 100000.  
AcqTime 0.  
PD 5.  
RGain 23  
Broad.Factor 0.  
ExMode non  
IrrNuc 1H  
IrrFreq 500.  
z

<sup>31</sup>P NMR Spectrum of Compound **2b**

File L:\500M NMR\10-20\RM-14-product-P\RM-14-product-P.rml

No. 2 / ppm Height  
1 21.8831 100

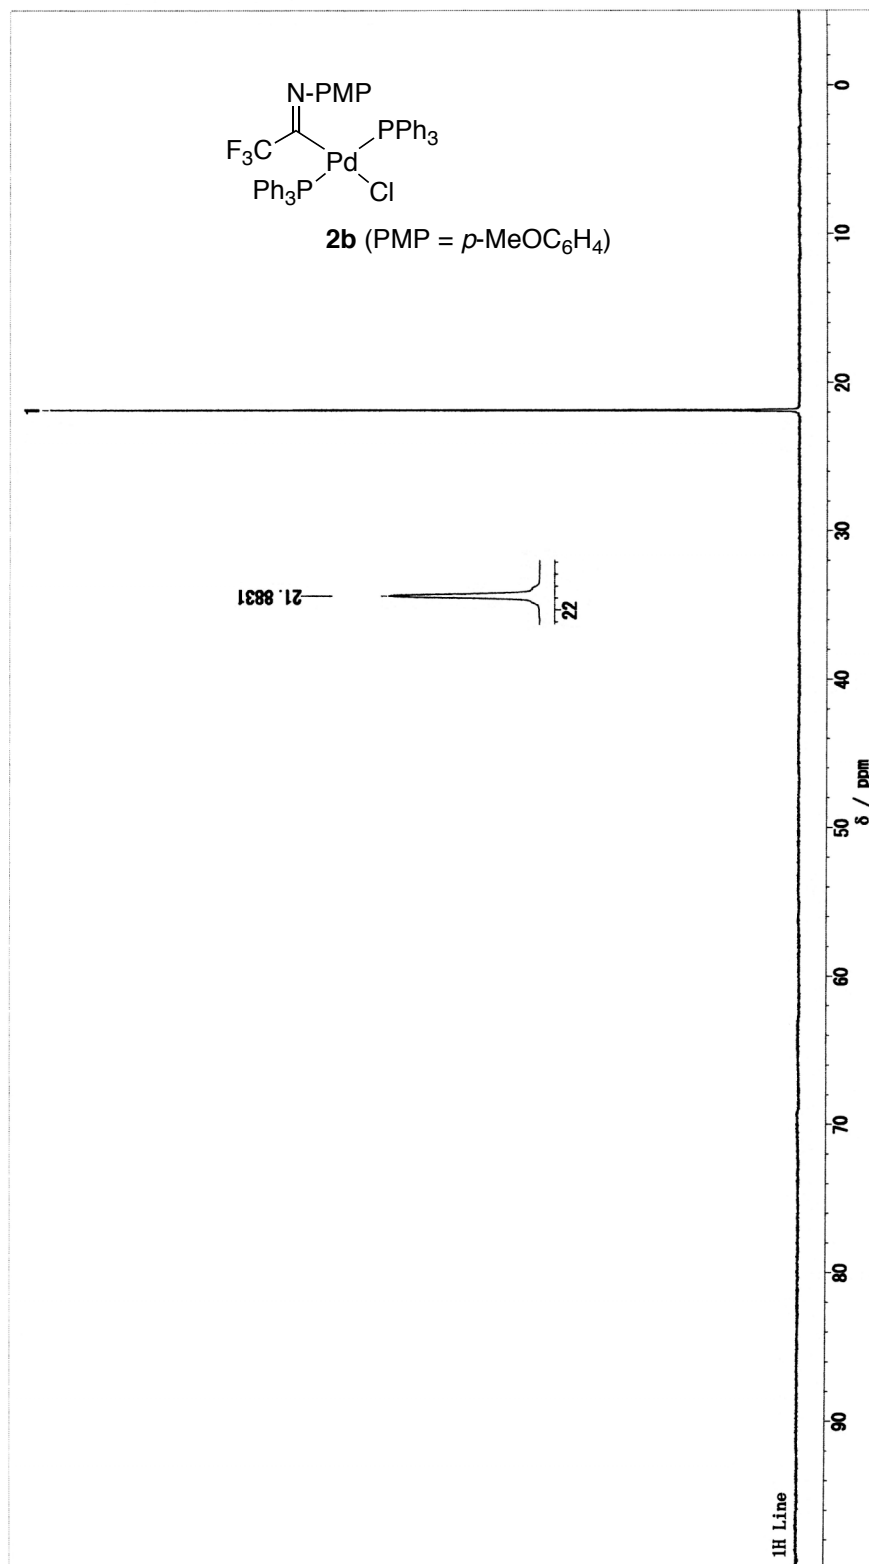

# <sup>1</sup>H NMR Spectrum of Compound 2c

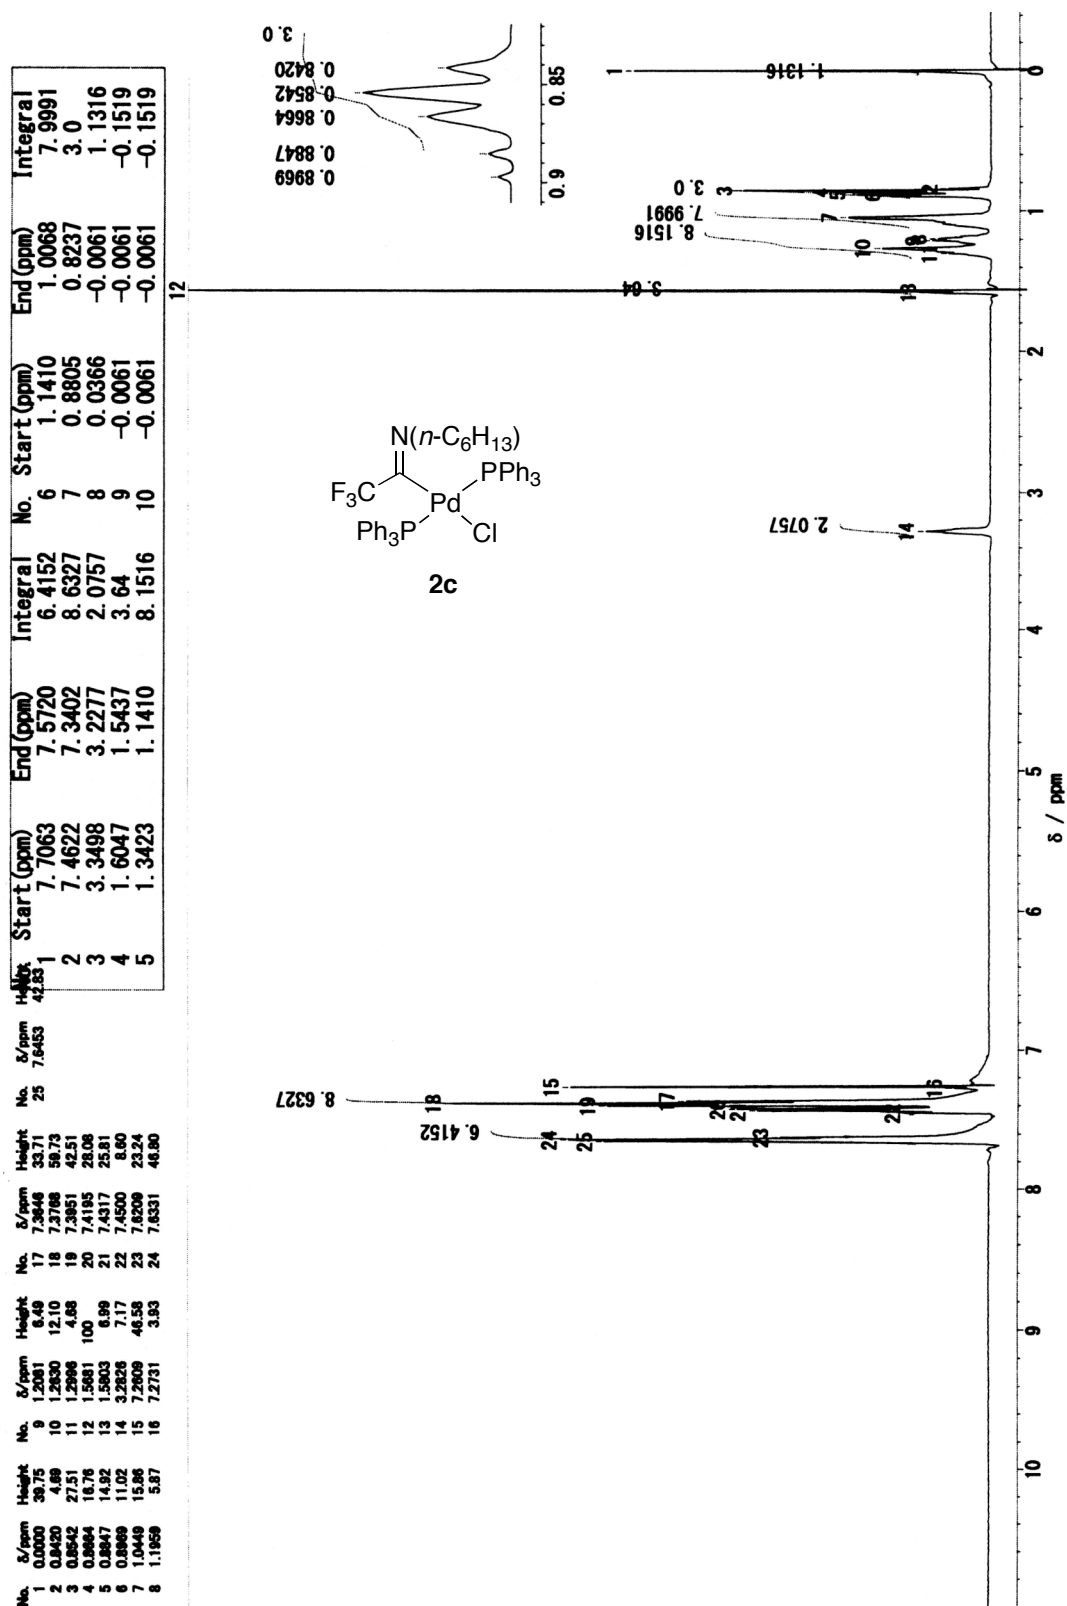

<sup>19</sup>F NMR Spectrum of Compound **2c**

No. 5/ppm Height  
1 992117 100

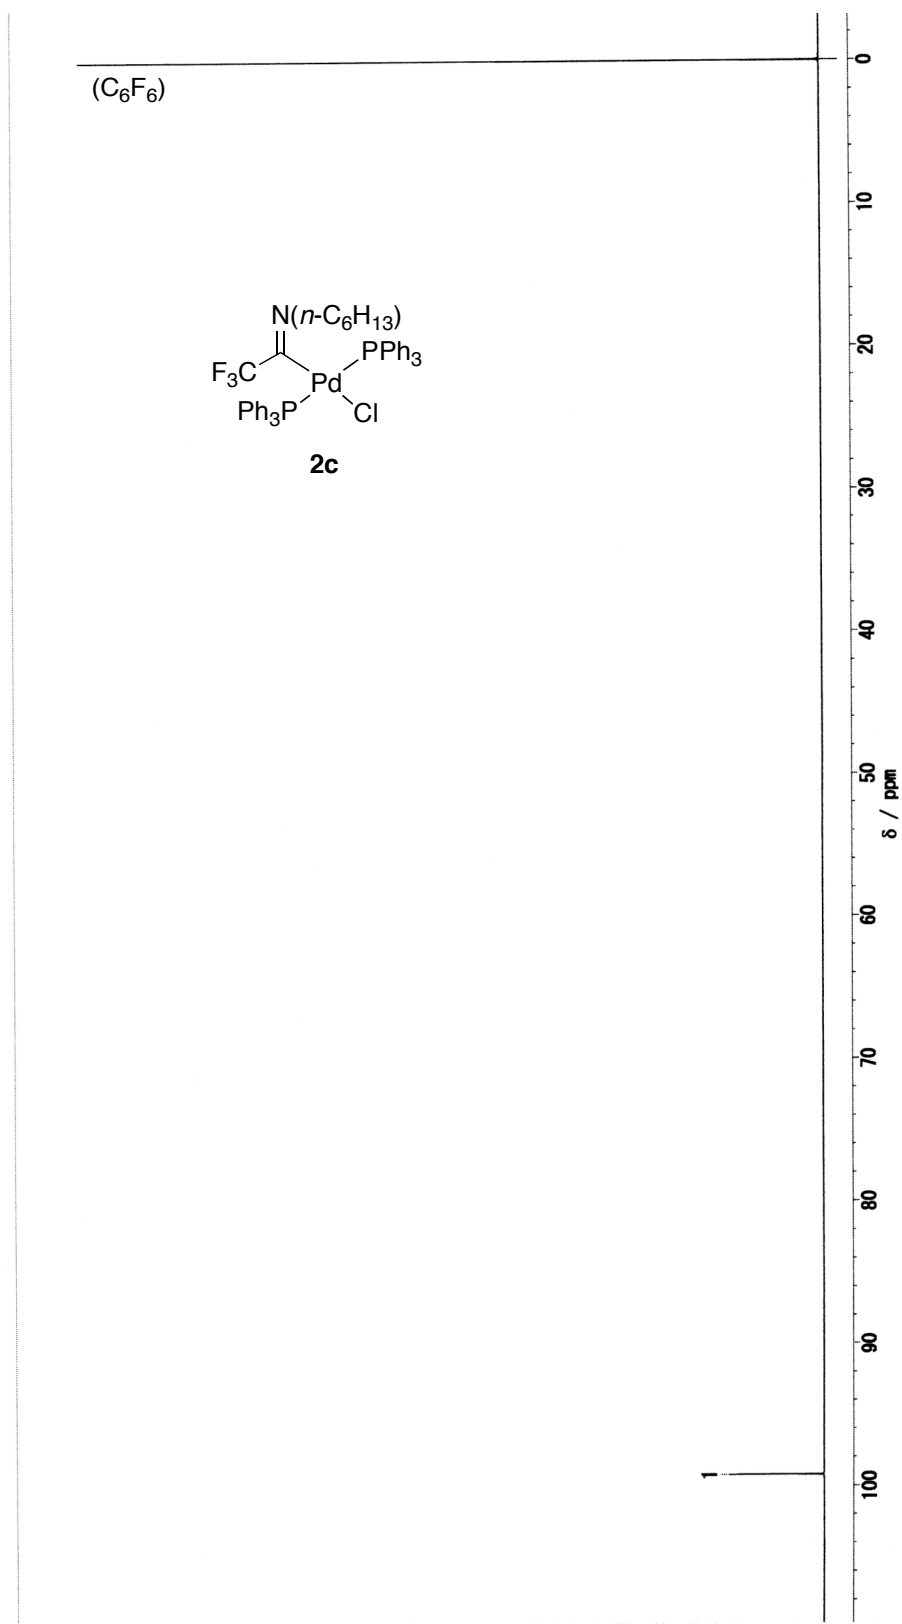

<sup>31</sup>P NMR Spectrum of Compound **2c**

File L:\500M NMR\10-18\FRM-34-product-PHRM-34-product-P.nm.fid

No. 1  
δ/ppm 23.0625  
Height 100

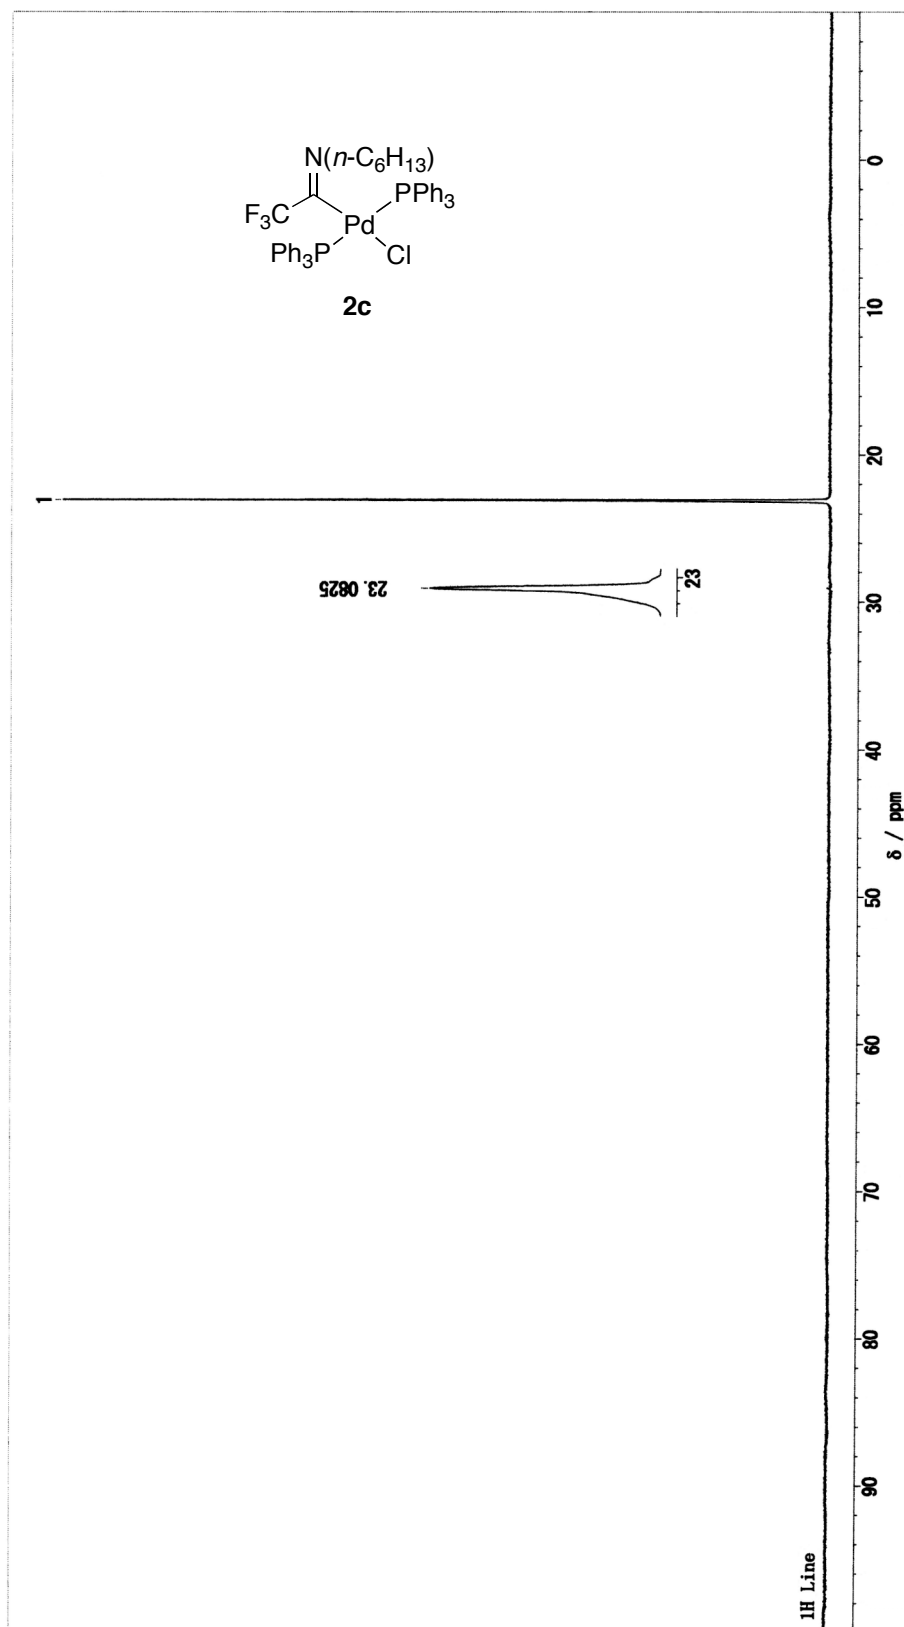

### <sup>1</sup>H NMR Spectrum of Compound **2d**

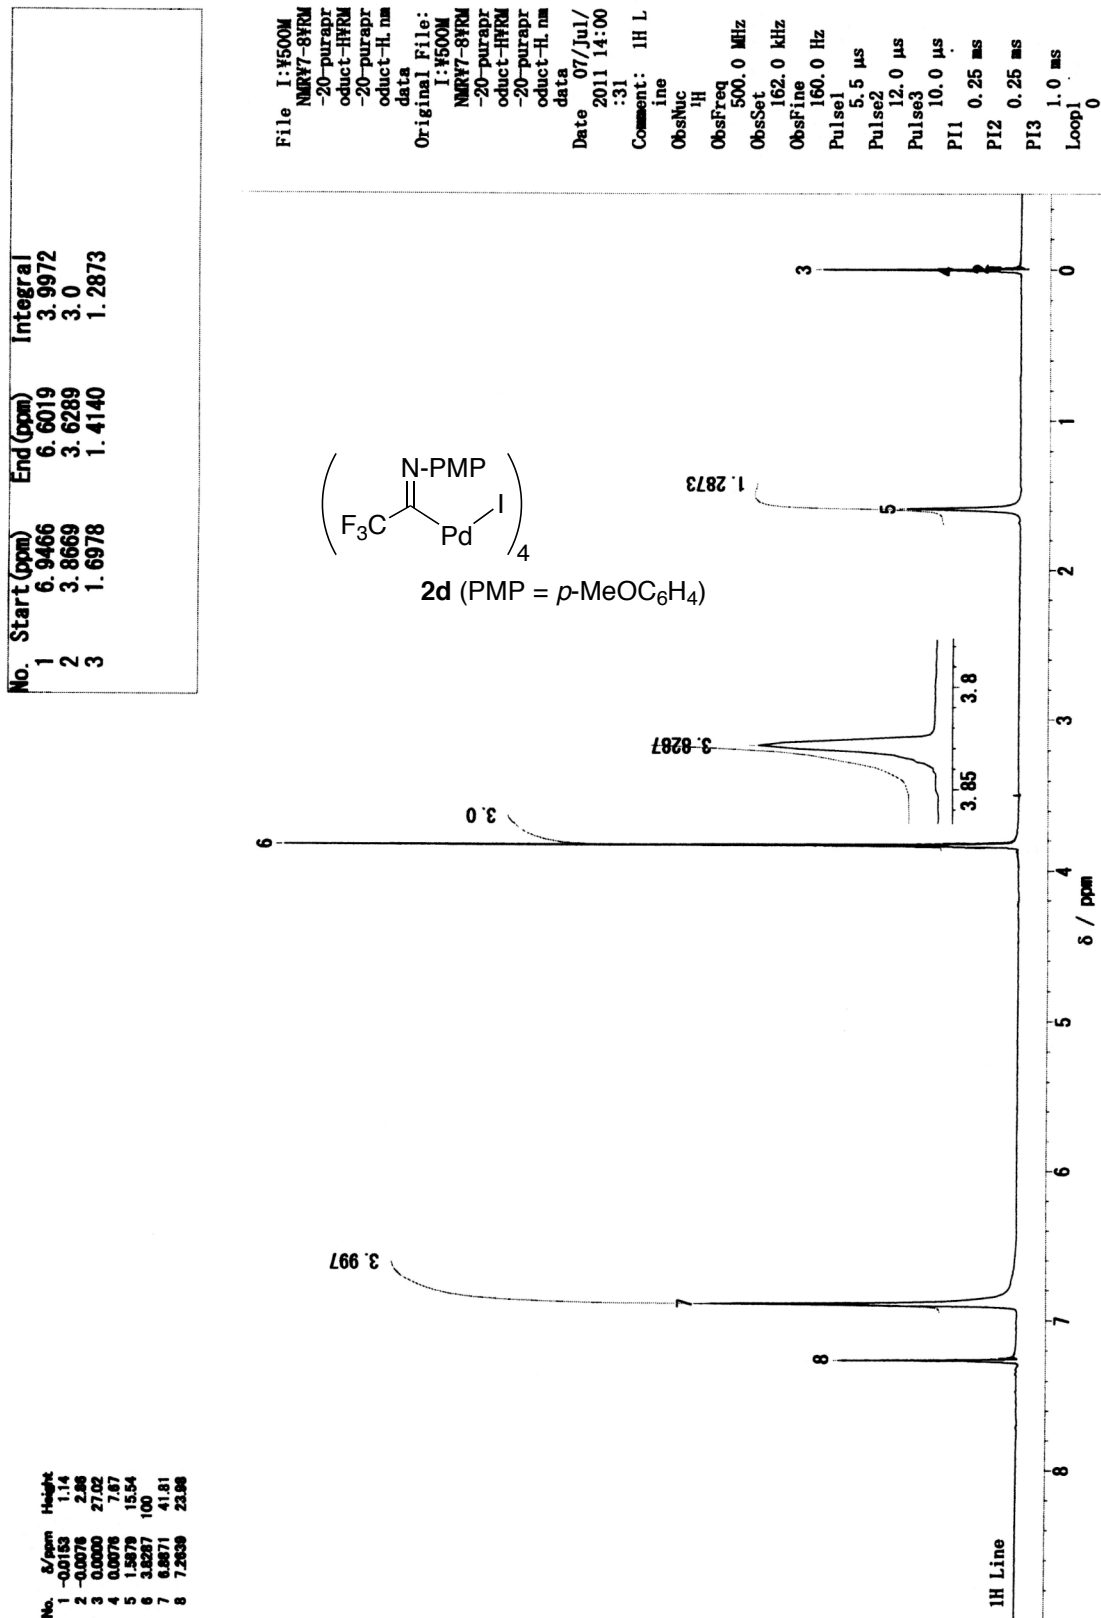

<sup>19</sup>F NMR Spectrum of Compound **2d**

File I:\500M  
 NMR\7-8\PM  
 -20-purapr  
 oduct-F\PM  
 -20-purapr  
 oduct-F.nm  
 data  
 Original File:  
 I:\500M  
 NMR\7-8\PM  
 -20-purapr  
 oduct-F\PM  
 -20-purapr  
 oduct-F.nm  
 data  
 Date 07/Jul/  
 2011 14:08  
 :21  
 Comment: 1H L  
 ine  
 ObsNuc  
 19F  
 ObsFreq  
 470.4 MHz  
 ObsSet  
 163.0 kHz  
 ObsFine  
 190.25 Hz  
 Pulse1  
 6.08 μs  
 Pulse2  
 12.0 μs  
 Pulse3  
 10.0 μs  
 PI1  
 600.0 ms  
 PI2  
 0.05 ms  
 PI3  
 1.0 ms  
 Loop1  
 0

(C<sub>6</sub>F<sub>6</sub>)

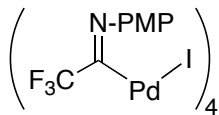

**2d** (PMP = *p*-MeOC<sub>6</sub>H<sub>4</sub>)

104.0305

104

1H Line

δ / ppm

No. 2/2mm Height  
 1 104.0305 100



## File I:\¥500M NMR¥8-30¥RM-26-product-H¥RM-26-product-H.rml

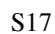

<sup>19</sup>F NMR Spectrum of Compound **18**

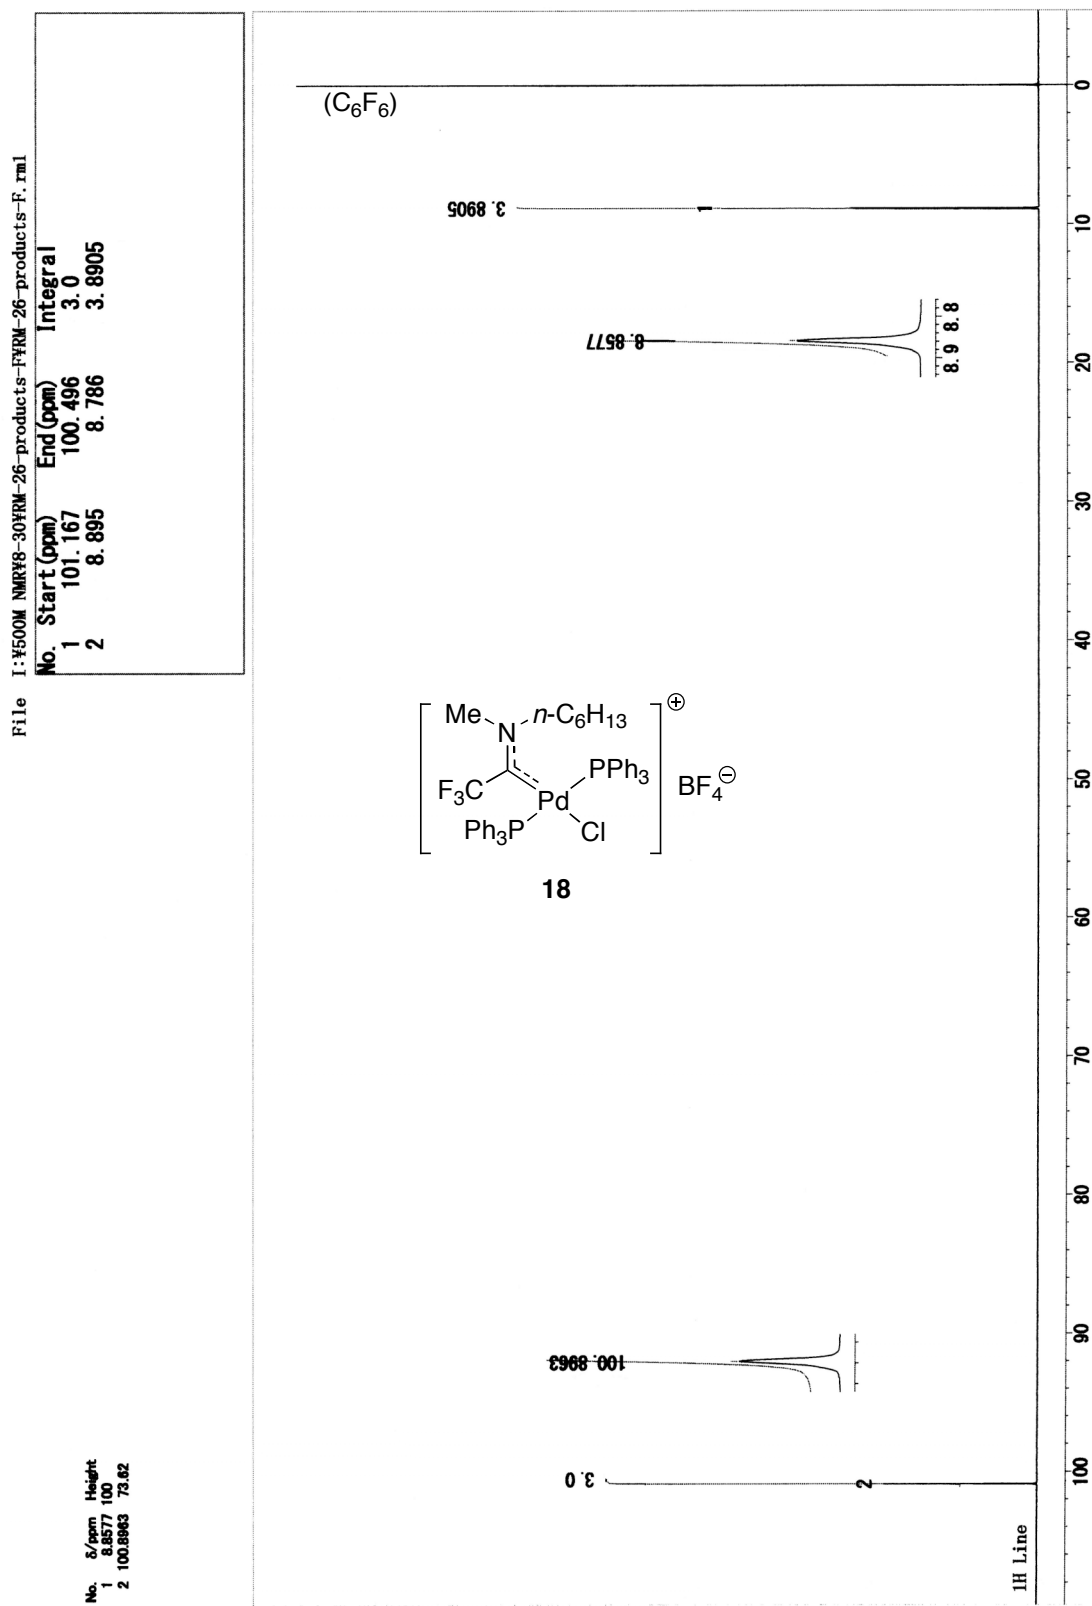

<sup>31</sup>P NMR Spectrum of Compound **18**

File C:\Users\Y\OneDrive\Desktop\500M NMR\10-30\NMR-26-product-PYRM-26-product-P.rml

No. 1  
s/ppm 21.0467  
Height 100

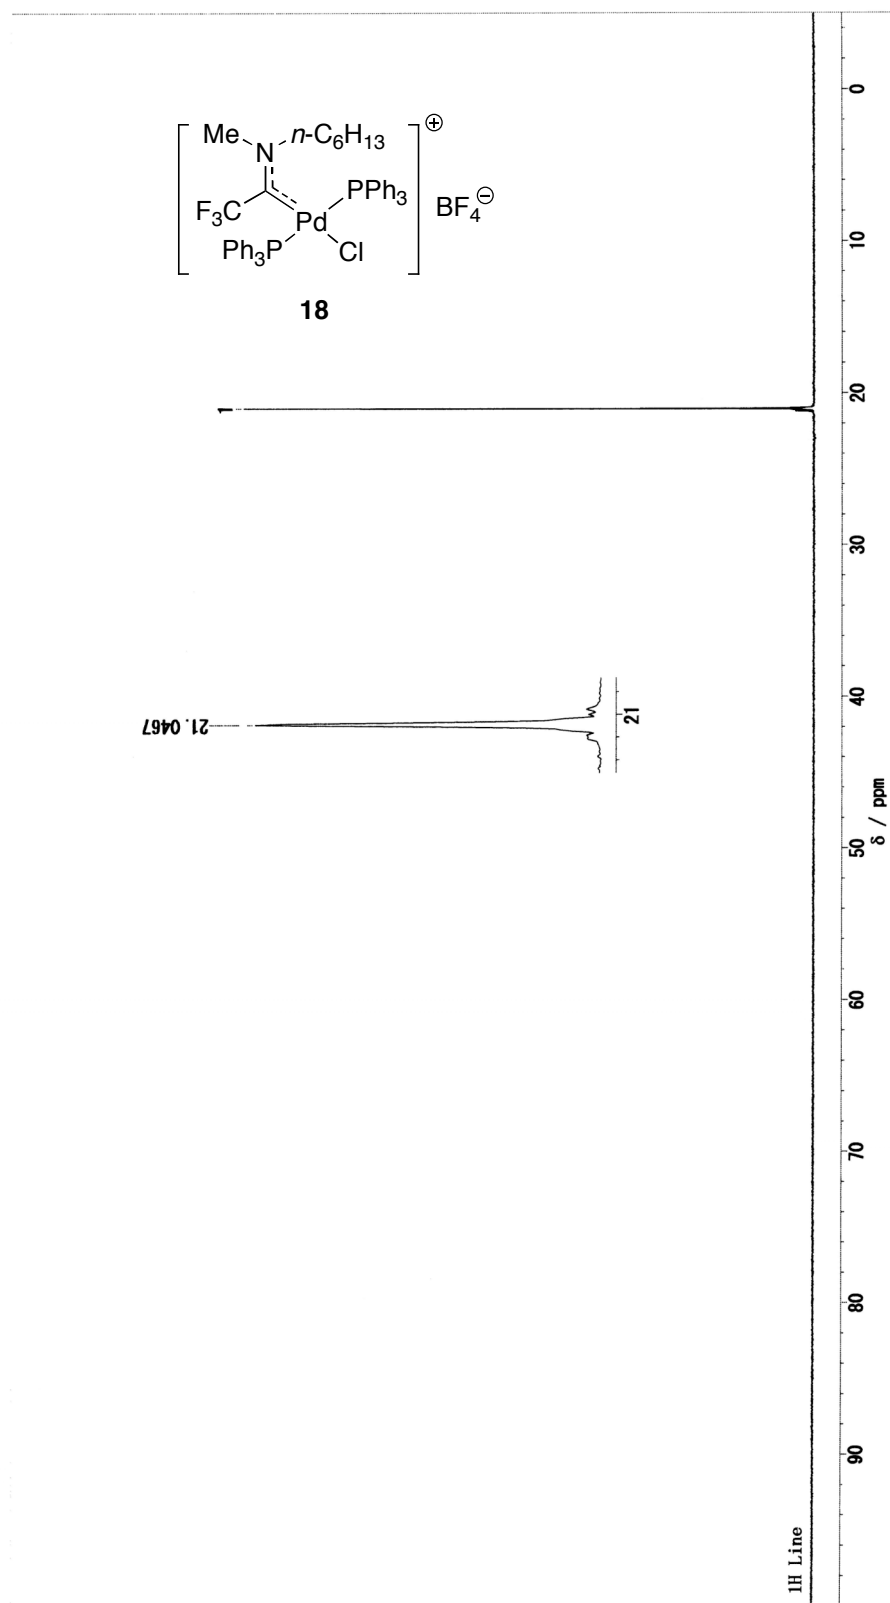

## File C:\Users\解井研\Desktop\¥500M NMP¥10-7¥RM-36-product-HVRM-36-product-HL.rml

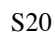

<sup>19</sup>F NMR Spectrum of Compound **20**

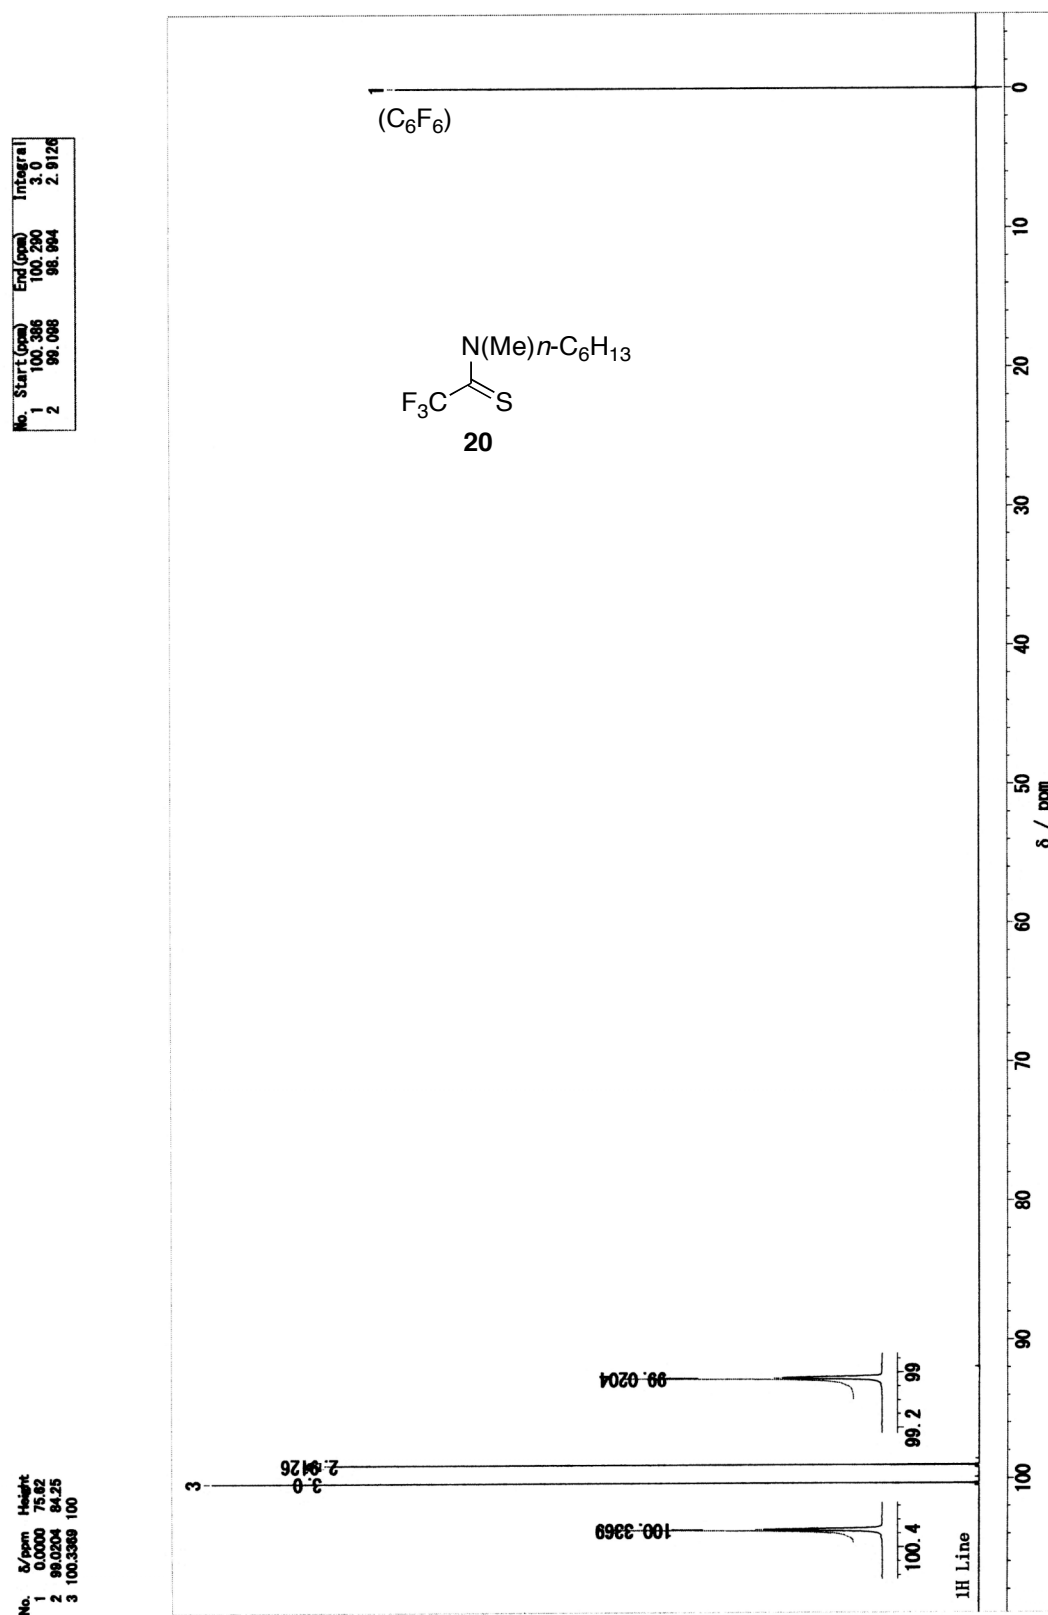

# <sup>1</sup>H NMR Spectrum of Compound 21

File C:\Users\zhang\Documents\NMR\10-14\NMR-40-purepure-HRM-40-purepure-HL.rml

| No. | δ/ppm  | Height |
|-----|--------|--------|-----|--------|--------|-----|--------|--------|-----|--------|--------|
| 1   | 0.0000 | 9.15   | 8   | 1.5501 | 8.82   | 15  | 3.7348 | 23.11  | 22  | 7.2867 | 12.19  |
| 2   | 0.0748 | 9.07   | 9   | 1.8822 | 9.55   | 16  | 3.7656 | 19.71  |     |        |        |
| 3   | 0.8895 | 68.65  | 10  | 3.1350 | 7.03   | 17  | 3.8390 | 9.64   |     |        |        |
| 4   | 1.2551 | 43.63  | 11  | 3.1455 | 11.09  | 18  | 3.8518 | 9.78   |     |        |        |
| 5   | 1.3009 | 100    | 12  | 3.1551 | 7.65   | 19  | 3.8681 | 9.57   |     |        |        |
| 6   | 1.4320 | 6.99   | 13  | 3.4219 | 17.45  | 20  | 4.8285 | 15.63  |     |        |        |
| 7   | 1.5361 | 8.02   | 14  | 3.4527 | 21.06  | 21  | 4.8390 | 16.01  |     |        |        |

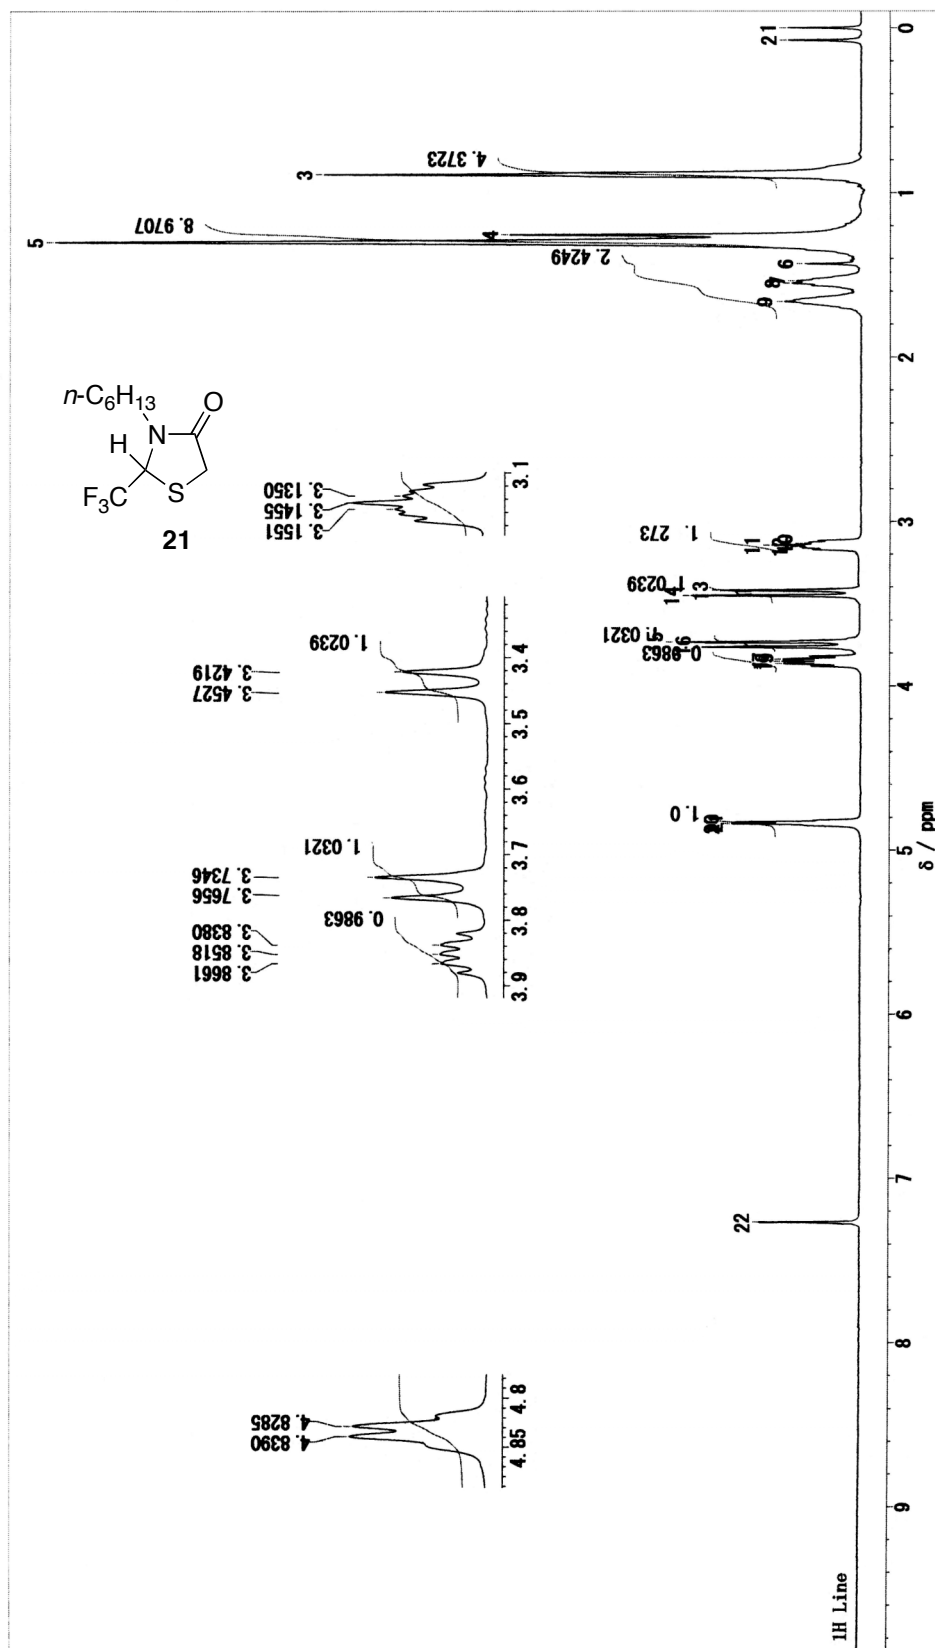

<sup>19</sup>F NMR Spectrum of Compound 21

File C:\Users\jw\井研\Desktop\F500M NMR\10-14\FM-40-purepure-F.nmfid

| No. | δ/ppm   | Height |
|-----|---------|--------|
| 1   | 0.0224  | 5.61   |
| 2   | 0.0386  | 12.13  |
| 3   | 0.0486  | 100    |
| 4   | 0.0667  | 11.44  |
| 5   | 0.0646  | 3.61   |
| 6   | 86.2227 | 75.96  |
| 7   | 86.2340 | 78.46  |

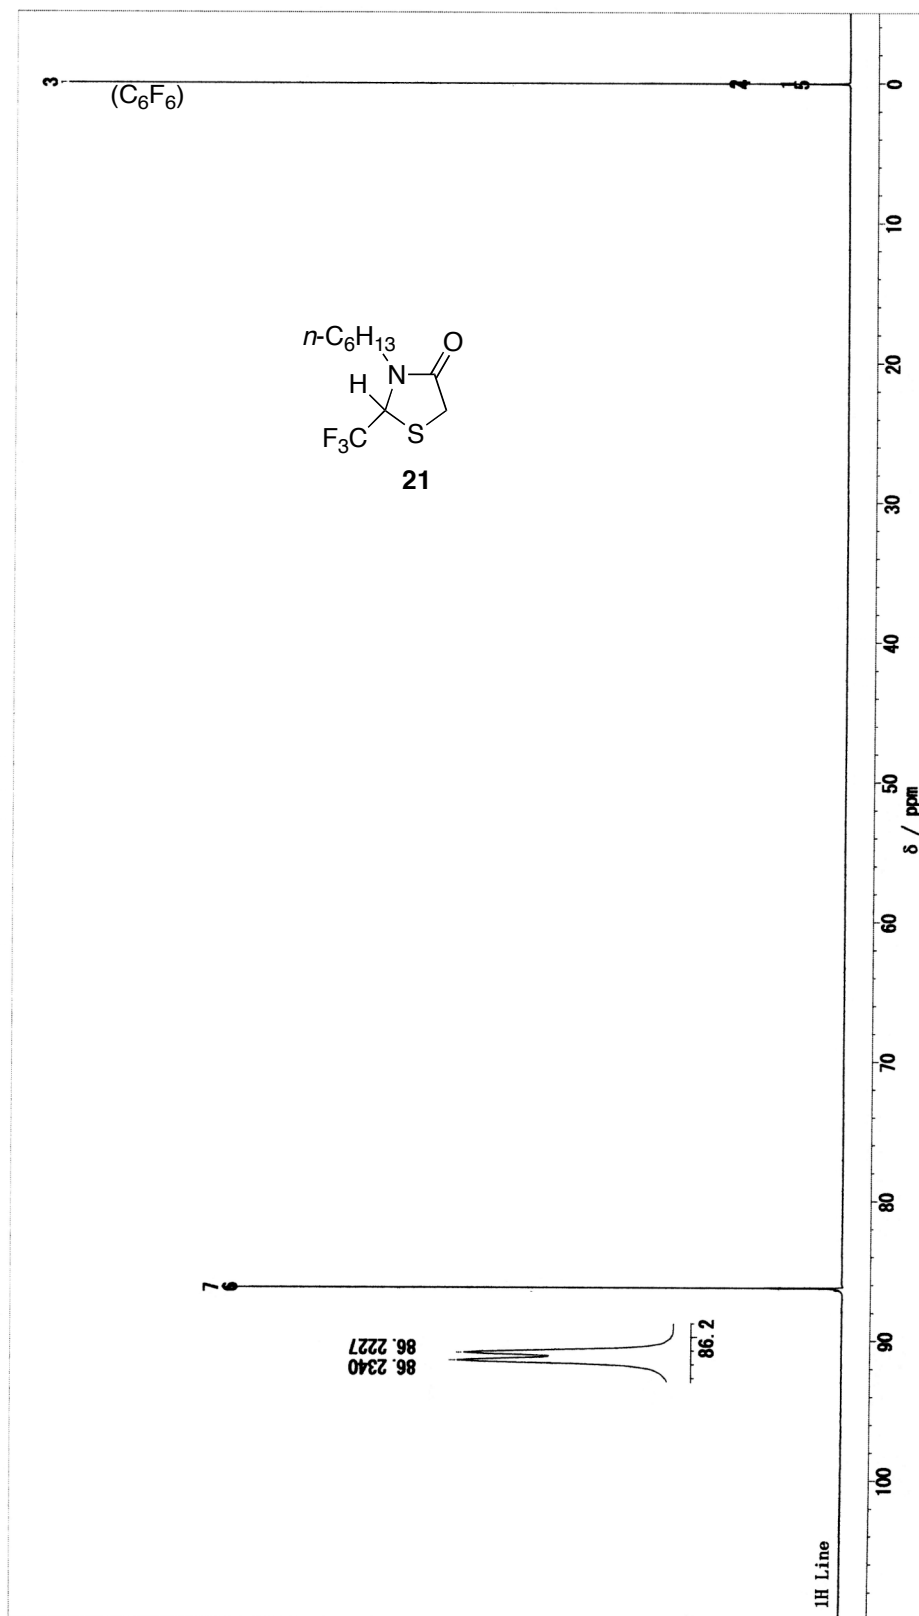

## References

- 1) Tamura, K.; Mizukami, H.; Maeda, K.; Watanabe, H.; Uneyama, K. *J. Org. Chem.* **1993**, *58*, 32
- 2) Uneyama, K.; Maeda, K.; Kato, T.; Katagiri, T. *Tetrahedron Lett.* **1998**, *39*, 3741.
- 3) Amii, H.; Kishikawa, Y.; Kageyama, K.; Uneyama, K. *J. Org. Chem.* **2000**, *65*, 3404.
